# Supplementary material
Source: publisher site journal article supplement (http://static.cambridge.org/content/id/urn:cambridge.org:id:article:S0022112016006777/resource/name/FLM1600677supp.zip)
Supplement: Supplementary file 1 [file FLM1600677supp.zip]

## Supplementary Material on

### “The effect of uniform electric field on the cross-stream migration of a drop in plane Poiseuille flow”

Shubhadeep Mandal<sup>1</sup>, Aditya Bandopadhyay<sup>2</sup>, and Suman Chakraborty<sup>1,2,†</sup>

<sup>1</sup>Department of Mechanical Engineering, Indian Institute of Technology Kharagpur, West Bengal- 721302, India

<sup>2</sup>Advanced Technology Development Center, Indian Institute of Technology Kharagpur, West Bengal- 721302, India

#### A. Method to obtain the unknown solid harmonics present in $O(Re_E)$ flow field

At  $O(Re_E)$ , the velocity and pressure fields are expressed in terms of the following solid harmonics using the Lamb solution:  $p_n^{(Re_E)}$ ,  $\Phi_n^{(Re_E)}$ ,  $\chi_n^{(Re_E)}$ ,  $p_{-n-1}^{(Re_E)}$ ,  $\Phi_{-n-1}^{(Re_E)}$  and  $\chi_{-n-1}^{(Re_E)}$ . These solid harmonics are contain the following unknown coefficients:  $A_n^{(Re_E)}$ ,  $B_n^{(Re_E)}$ ,  $C_n^{(Re_E)}$ ,  $A_{-n-1}^{(Re_E)}$ ,  $B_{-n-1}^{(Re_E)}$ ,  $C_{-n-1}^{(Re_E)}$ ,  $\hat{A}_n^{(Re_E)}$ ,  $\hat{B}_n^{(Re_E)}$ ,  $\hat{C}_n^{(Re_E)}$ ,  $\hat{A}_{-n-1}^{(Re_E)}$ ,  $\hat{B}_{-n-1}^{(Re_E)}$  and  $\hat{C}_{-n-1}^{(Re_E)}$ . These can be obtained by invoking the boundary conditions given in equation (2.14). However, to facilitate the application of orthogonality property of surface harmonics, we represent the boundary conditions at  $O(Re_E)$  in the following form (Haber & Hetsroni 1971; Happel & Brenner 1981; Brenner 1964; Bandopadhyay et al. 2016)

$$\left. \begin{aligned} & \left[ \mathbf{u}_i^{(Re_E)} \cdot \mathbf{r} \right]_{r=1} = 0, \\ & \left[ \mathbf{u}_e^{(Re_E)} \cdot \mathbf{r} \right]_{r=1} = 0, \\ & \left[ r \frac{\partial}{\partial r} (\mathbf{u}_i^{(Re_E)} \cdot \mathbf{e}_r) \right]_{r=1} = \left[ r \frac{\partial}{\partial r} (\mathbf{u}_e^{(Re_E)} \cdot \mathbf{e}_r) \right]_{r=1}, \\ & \left[ \mathbf{r} \cdot \nabla \times \mathbf{u}_i^{(Re_E)} \right]_{r=1} = \left[ \mathbf{r} \cdot \nabla \times \mathbf{u}_e^{(Re_E)} \right]_{r=1}, \\ & \left[ \mathbf{r} \cdot \nabla \times \left\{ \mathbf{r} \times (\mathbf{T}_i^{H(Re_E)} + M\mathbf{T}_i^{E(Re_E)}) \right\} \right]_{r=1} = \left[ \mathbf{r} \cdot \nabla \times \left\{ \mathbf{r} \times (\mathbf{T}_e^{H(Re_E)} + M\mathbf{T}_e^{E(Re_E)}) \right\} \right]_{r=1}, \\ & \left[ \mathbf{r} \cdot \nabla \times (\mathbf{T}_i^{H(Re_E)} + M\mathbf{T}_i^{E(Re_E)}) \right]_{r=1} = \left[ \mathbf{r} \cdot \nabla \times (\mathbf{T}_e^{H(Re_E)} + M\mathbf{T}_e^{E(Re_E)}) \right]_{r=1}, \end{aligned} \right\} \quad (A1)$$

where the notation  $[\xi]_{r=1}$  represents the determination of the quantity  $\xi$  at  $r=1$ . The hydrodynamic traction vector at  $O(Re_E)$  can be written as (Leal 2007)

$$\begin{aligned} \mathbf{T}_i^{H(Re_E)} &= \left[ -p_i^{(Re_E)} \mathbf{I} + \lambda \left\{ \nabla \mathbf{u}_i^{(Re_E)} + \left( \nabla \mathbf{u}_i^{(Re_E)} \right)^T \right\} \right] \cdot \mathbf{e}_r, \\ \mathbf{T}_e^{H(Re_E)} &= \left[ -p_e^{(Re_E)} \mathbf{I} + \nabla \mathbf{u}_e^{(Re_E)} + \left( \nabla \mathbf{u}_e^{(Re_E)} \right)^T \right] \cdot \mathbf{e}_r, \end{aligned} \quad (\text{A2})$$

where superscript  $T$  represents the transpose of respective tensors.

Before expressing the electric traction vector, we represent the electric field in spherical coordinate as  $\mathbf{E} = E_r \mathbf{e}_r + E_\theta \mathbf{e}_\theta + E_\phi \mathbf{e}_\phi$ . Now, the electrical traction vector inside and outside the drop  $(\mathbf{T}_{i,e}^{E(Re_E)})$  at  $O(Re_E)$  are given as (Im & Kang 2003)

$$\begin{aligned} \mathbf{T}_i^{E(Re_E)} &= S \left[ \begin{aligned} &E_{i,r}^{(0)} E_{i,r}^{(Re_E)} - \frac{1}{2} \left( 2E_{i,r}^{(0)} E_{i,r}^{(Re_E)} + 2E_{i,\theta}^{(0)} E_{i,\theta}^{(Re_E)} + 2E_{i,\phi}^{(0)} E_{i,\phi}^{(Re_E)} \right) \\ &\left( E_{i,r}^{(0)} E_{i,\theta}^{(Re_E)} + E_{i,r}^{(Re_E)} E_{i,\theta}^{(0)} \right) \\ &\left( E_{i,r}^{(0)} E_{i,\phi}^{(Re_E)} + E_{i,r}^{(Re_E)} E_{i,\phi}^{(0)} \right) \end{aligned} \right], \\ \mathbf{T}_e^{E(Re_E)} &= \left[ \begin{aligned} &E_{e,r}^{(0)} E_{e,r}^{(Re_E)} - \frac{1}{2} \left( 2E_{e,r}^{(0)} E_{e,r}^{(Re_E)} + 2E_{e,\theta}^{(0)} E_{e,\theta}^{(Re_E)} + 2E_{e,\phi}^{(0)} E_{e,\phi}^{(Re_E)} \right) \\ &\left( E_{e,r}^{(0)} E_{e,\theta}^{(Re_E)} + E_{e,r}^{(Re_E)} E_{e,\theta}^{(0)} \right) \\ &\left( E_{e,r}^{(0)} E_{e,\phi}^{(Re_E)} + E_{e,r}^{(Re_E)} E_{e,\phi}^{(0)} \right) \end{aligned} \right]. \end{aligned} \quad (\text{A3})$$

Our first task is to represent different expressions present in equation (A1) in terms of solid harmonics in the following form (Happel & Brenner 1981; Hetsroni & Haber 1970)

$$\begin{aligned} \left[ \mathbf{u}_i^{(Re_E)} \cdot \mathbf{r} \right]_{r=1} &= \sum_{n=1}^{\infty} \left[ \frac{n}{2\lambda(2n+3)} p_n^{(Re_E)} + n\Phi_n^{(Re_E)} \right], \\ \left[ \mathbf{u}_e^{(Re_E)} \cdot \mathbf{r} \right]_{r=1} &= \sum_{n=1}^{\infty} \left[ \frac{n+1}{2(2n-3)} p_{-n-1}^{(Re_E)} - (n+1)\Phi_{-n-1}^{(Re_E)} \right], \\ \left[ r \frac{\partial}{\partial r} (\mathbf{u}_i^{(Re_E)} \cdot \mathbf{e}_r) \right]_{r=1} &= -\sum_{n=1}^{\infty} \left[ \frac{n(n+1)}{2\lambda(2n+3)} p_n^{(Re_E)} + n(n-1)\Phi_n^{(Re_E)} \right], \\ \left[ r \frac{\partial}{\partial r} (\mathbf{u}_e^{(Re_E)} \cdot \mathbf{e}_r) \right]_{r=1} &= \sum_{n=1}^{\infty} \left[ \frac{n(n+1)}{2(2n-1)} p_{-n-1}^{(Re_E)} - (n+1)(n+2)\Phi_{-n-1}^{(Re_E)} \right], \\ \left[ \mathbf{r} \cdot \nabla \times \mathbf{u}_i^{(Re_E)} \right]_{r=1} &= \sum_{n=1}^{\infty} n(n+1) \chi_n^{(Re_E)}, \\ \left[ \mathbf{r} \cdot \nabla \times \mathbf{u}_e^{(Re_E)} \right]_{r=1} &= \sum_{n=1}^{\infty} n(n+1) \chi_{-n-1}^{(Re_E)}. \end{aligned} \quad (\text{A4})$$

Next we express  $\left[ \mathbf{r} \cdot \nabla \times \left\{ \mathbf{r} \times \left( \mathbf{T}^{H(Re_E)} + M \mathbf{T}^{E(Re_E)} \right) \right\} \right]_{r=1}$  and  $\left[ \mathbf{r} \cdot \nabla \times \left( \mathbf{T}^{H(Re_E)} + M \mathbf{T}^{E(Re_E)} \right) \right]_{r=1}$  in the following form (Hetsroni & Haber 1970)

$$\left. \begin{aligned} \left[ \mathbf{r} \cdot \nabla \times \left\{ \mathbf{r} \times \mathbf{T}_i^{H(Re_E)} \right\} \right]_{r=1} &= -\lambda \sum_{n=1}^{\infty} \left[ 2(n-1)n(n+1) \Phi_n^{(Re_E)} + \frac{n^2(n+2)}{\lambda(2n+3)} p_n^{(Re_E)} \right], \\ \left[ \mathbf{r} \cdot \nabla \times \left\{ \mathbf{r} \times \mathbf{T}_e^{H(Re_E)} \right\} \right]_{r=1} &= -\sum_{n=1}^{\infty} \left[ -2(n+2)n(n+1) \Phi_{-n-1}^{(Re_E)} + \frac{(n+1)^2(n-1)}{(2n-1)} p_{-n-1}^{(Re_E)} \right], \\ \left[ \mathbf{r} \cdot \nabla \times \mathbf{T}_i^{H(Re_E)} \right]_{r=1} &= \lambda \sum_{n=1}^{\infty} (n-1)n(n+1) \chi_n^{(Re_E)}, \\ \left[ \mathbf{r} \cdot \nabla \times \mathbf{T}_e^{H(Re_E)} \right]_{r=1} &= -\sum_{n=1}^{\infty} (n+2)n(n+1) \chi_{-n-1}^{(Re_E)}, \\ \left[ \mathbf{r} \cdot \nabla \times \left( \mathbf{r} \times \mathbf{T}_i^{E(Re_E)} \right) \right]_{r=1} &= \sum_{n=0}^{\infty} \left[ g_{n,m}^{i(Re_E)} \cos(m\phi) + \hat{g}_{n,m}^{i(Re_E)} \sin(m\phi) \right] P_{n,m}, \\ \left[ \mathbf{r} \cdot \nabla \times \left( \mathbf{r} \times \mathbf{T}_e^{E(Re_E)} \right) \right]_{r=1} &= \sum_{n=0}^{\infty} \left[ g_{n,m}^{e(Re_E)} \cos(m\phi) + \hat{g}_{n,m}^{e(Re_E)} \sin(m\phi) \right] P_{n,m}, \\ \left[ \mathbf{r} \cdot \nabla \times \mathbf{T}_i^{E(Re_E)} \right]_{r=1} &= \sum_{n=0}^{\infty} \left[ h_{n,m}^{e(Re_E)} \cos(m\phi) + \hat{h}_{n,m}^{e(Re_E)} \sin(m\phi) \right] P_{n,m}, \\ \left[ \mathbf{r} \cdot \nabla \times \mathbf{T}_e^{E(Re_E)} \right]_{r=1} &= \sum_{n=0}^{\infty} \left[ h_{n,m}^{e(Re_E)} \cos(m\phi) + \hat{h}_{n,m}^{e(Re_E)} \sin(m\phi) \right] P_{n,m}, \end{aligned} \right\} \quad (A5)$$

where the terms  $g_{n,m}^{i(Re_E)}$ ,  $\hat{g}_{n,m}^{i(Re_E)}$ ,  $h_{n,m}^{i(Re_E)}$ ,  $\hat{h}_{n,m}^{i(Re_E)}$ ,  $g_{n,m}^{e(Re_E)}$ ,  $\hat{g}_{n,m}^{e(Re_E)}$ ,  $h_{n,m}^{e(Re_E)}$  and  $\hat{h}_{n,m}^{e(Re_E)}$  can be easily evaluated from the known electric potential at  $O(Re_E)$ . Next, we substitute the expressions from equations (A4) and (A5) in the equation (A1) and obtain the six independent linear algebraic equations. By solving those six equations, we obtain the coefficients  $A_n^{(Re_E)}$ ,  $B_n^{(Re_E)}$ ,  $C_n^{(Re_E)}$ ,  $A_{-n-1}^{(Re_E)}$ ,  $B_{-n-1}^{(Re_E)}$  and  $C_{-n-1}^{(Re_E)}$  in the following general form

$$\left. \begin{aligned}
A_{n,m}^{(Re_E)} &= \frac{(2n+3)}{n(2n+1)(\lambda+1)} \left[ (2n+1)(2n-1) \beta_{n,m}^{(Re_E)} + M \left( g_{n,m}^{i(Re_E)} - g_{n,m}^{e(Re_E)} \right) \right], \\
B_{n,m}^{(Re_E)} &= -\frac{A_{n,m}^{(Re_E)}}{2(2n+3)}, \\
C_{n,m}^{(Re_E)} &= \frac{M \left( h_{n,m}^{e(Re_E)} - h_{n,m}^{i(Re_E)} \right)}{n(n+1)(\lambda(n-1) + (n+2))}, \\
A_{-n-1,m}^{(Re_E)} &= -\frac{\left[ (4n^2-1) \{ (2n+1)\lambda + 2 \} \beta_{n,m}^{(Re_E)} + M(1-2n) \left( g_{n,m}^{i(Re_E)} - g_{n,m}^{e(Re_E)} \right) \right]}{(n+1)(2n+1)(\lambda+1)}, \\
B_{-n-1,m}^{(Re_E)} &= -\frac{(4n^2-1)\lambda \beta_{n,m}^{(Re_E)} + M \left( g_{n,m}^{e(Re_E)} - g_{n,m}^{i(Re_E)} \right)}{2(2n+1)(n+1)(\lambda+1)}, \\
C_{-n-1,m}^{(Re_E)} &= C_{n,m}^{(Re_E)}.
\end{aligned} \right\} \quad (A6)$$

Rest of the coefficients  $\hat{A}_{n,m}^{(Re_E)}, \hat{B}_{n,m}^{(Re_E)}, \hat{C}_{n,m}^{(Re_E)}, \hat{A}_{-n-1,m}^{(Re_E)}, \hat{B}_{-n-1,m}^{(Re_E)}$  and  $\hat{C}_{-n-1,m}^{(Re_E)}$  are obtained by replacing  $\beta_{n,m}^{(Re_E)}, g_{n,m}^{i(Re_E)}, h_{n,m}^{i(Re_E)}, g_{n,m}^{e(Re_E)}$  and  $h_{n,m}^{e(Re_E)}$  by  $\hat{\beta}_{n,m}^{(Re_E)}, \hat{g}_{n,m}^{i(Re_E)}, \hat{h}_{n,m}^{i(Re_E)}, \hat{g}_{n,m}^{e(Re_E)}$  and  $\hat{h}_{n,m}^{e(Re_E)}$ , respectively in equation (A6).  $\beta_{n,m}^{(Re_E)}$  and  $\hat{\beta}_{n,m}^{(Re_E)}$  present in equation (A6) can be expressed in terms of drop velocity if the following form

$$\left. \begin{aligned}
\beta_{n,m}^{(Re_E)} &= \begin{cases} \beta_{1,0}^{(Re_E)} = -U_{dz}^{(Re_E)}, \beta_{1,1}^{(Re_E)} = -U_{dx}^{(Re_E)} \\ 0 \quad \forall n \geq 2 \end{cases} \\
\hat{\beta}_{n,m}^{(Re_E)} &= \begin{cases} \hat{\beta}_{1,1}^{(Re_E)} = -U_{dy}^{(Re_E)} \\ 0 \quad \forall n \geq 2. \end{cases}
\end{aligned} \right\} \quad (A7)$$

## B. Method to obtain the unknown solid harmonics present in $O(Ca)$ flow field

Determination of  $O(Ca)$  velocity and pressure fields are much involved than the  $O(Re_E)$  calculations. We first express the boundary conditions in the following form (Haber & Hetsroni 1971; Brenner 1964; Chaffey & Brenner 1967)

$$\left. \begin{aligned}
& \left[ \mathbf{u}_i \Big|_{r=1+Ca f^{(Ca)}} \cdot \mathbf{n} \right]^{(Ca)} = 0, \\
& \left[ \mathbf{u}_e \Big|_{r=1+Ca f^{(Ca)}} \cdot \mathbf{n} \right]^{(Ca)} = 0, \\
& \left[ \nabla \cdot \mathbf{u}_i \Big|_{r=1+Ca f^{(Ca)}} \right]^{(Ca)} = \left[ \nabla \cdot \mathbf{u}_e \Big|_{r=1+Ca f^{(Ca)}} \right]^{(Ca)}, \\
& \left[ \mathbf{n} \cdot \nabla \times \mathbf{u}_i \Big|_{r=1+Ca f^{(Ca)}} \right]^{(Ca)} = \left[ \mathbf{n} \cdot \nabla \times \mathbf{u}_e \Big|_{r=1+Ca f^{(Ca)}} \right]^{(Ca)}, \\
& \left[ \mathbf{n} \cdot \nabla \times \left\{ \mathbf{n} \times (\mathbf{T}_i^H + M \mathbf{T}_i^E) \Big|_{r=1+Ca f^{(Ca)}} \right\} \right]^{(Ca)} = \left[ \mathbf{n} \cdot \nabla \times \left\{ \mathbf{n} \times (\mathbf{T}_e^H + M \mathbf{T}_e^E) \Big|_{r=1+Ca f^{(Ca)}} \right\} \right]^{(Ca)}, \\
& \left[ \mathbf{n} \cdot \nabla \times (\mathbf{T}_i^H + M \mathbf{T}_i^E) \Big|_{r=1+Ca f^{(Ca)}} \right]^{(Ca)} = \left[ \mathbf{n} \cdot \nabla \times (\mathbf{T}_e^H + M \mathbf{T}_e^E) \Big|_{r=1+Ca f^{(Ca)}} \right]^{(Ca)},
\end{aligned} \right\} \quad (\text{B1})$$

where  $\mathbf{n}$  represents the outward unit normal to the drop surface which can be obtained by solving leading order problem. In equation (B1), the notation  $\left[ \xi \Big|_{r=1+Ca f^{(Ca)}} \right]^{(Ca)}$  is used to express the  $O(Ca)$  contribution of the term  $\xi$  which is evaluated at the deformed drop surface  $r = 1 + Ca f^{(Ca)}$ . Here  $f^{(Ca)}$  represents the correction in drop shape from sphericity which can be obtained by solving leading order problem. To evaluate the  $O(Ca)$  contribution of each term we use the Taylor series expansion about  $r = 1$  in the following form (Haber & Hetsroni 1971; Ajayi 1978; Xu & Homsy 2006)

$$\left. \begin{aligned}
& \xi \Big|_{r=1+Ca f^{(Ca)}} = \xi^{(0)} \Big|_{r=1} + Re_E \xi^{(Re_E)} \Big|_{r=1} + Ca \left( \xi^{(Ca)} \Big|_{r=1} + f^{(Ca)} \frac{\partial \xi^{(0)}}{\partial r} \Big|_{r=1} \right) + \dots, \\
& \Rightarrow \left[ \xi \Big|_{r=1+Ca f^{(Ca)}} \right]^{(Ca)} = \left( \xi^{(Ca)} \Big|_{r=1} + f^{(Ca)} \frac{\partial \xi^{(0)}}{\partial r} \Big|_{r=1} \right).
\end{aligned} \right\} \quad (\text{B2})$$

Using this method the boundary conditions in equation (B1) can be simplified to the following form (Haber & Hetsroni 1971; Brenner 1964)

$$\left. \begin{aligned}
& \left[ \mathbf{u}_i^{(Ca)} \cdot \mathbf{r} \right]_{r=1} = T_1, \\
& \left[ \mathbf{u}_e^{(Ca)} \cdot \mathbf{r} \right]_{r=1} = T_2, \\
& \left[ r \frac{\partial}{\partial r} (\mathbf{u}_e^{(Ca)} \cdot \mathbf{e}_r) - r \frac{\partial}{\partial r} (\mathbf{u}_i^{(Ca)} \cdot \mathbf{e}_r) \right]_{r=1} = T_3, \\
& \left[ \mathbf{r} \cdot \nabla \times (\mathbf{u}_e^{(Ca)} - \mathbf{u}_i^{(Ca)}) \right]_{r=1} = T_5, \\
& \left[ \mathbf{r} \cdot \nabla \times \left( \mathbf{r} \times \left\{ (\mathbf{T}_e^{H(Ca)} + M\mathbf{T}_e^{E(Ca)}) - (\mathbf{T}_i^{H(Ca)} + M\mathbf{T}_i^{E(Ca)}) \right\} \right) \right]_{r=1} = T_4, \\
& \left[ \mathbf{r} \cdot \nabla \times \left\{ (\mathbf{T}_e^{H(Ca)} + M\mathbf{T}_e^{E(Ca)}) - (\mathbf{T}_i^{H(Ca)} + M\mathbf{T}_i^{E(Ca)}) \right\} \right]_{r=1} = T_6,
\end{aligned} \right\} \quad (\text{B3})$$

where the terms  $T_1 - T_6$  can be easily obtained using following relations (Haber & Hetsroni 1971)

$$\left. \begin{aligned}
T_1 &= \sum_{n=1}^4 \left( T_{1,n,m}^{(Ca)} \cos m\phi + \hat{T}_{1,n,m}^{(Ca)} \sin m\phi \right) P_{n,m} = \mathbf{u}_i^{(0)} \Big|_{r=1} \cdot \tilde{\nabla} f^{(Ca)} - f^{(Ca)} \left( \frac{\partial \mathbf{u}_i^{(0)}}{\partial r} \right) \Big|_{r=1} \cdot \mathbf{e}_r, \\
T_2 &= \sum_{n=1}^4 \left( T_{2,n,m}^{(Ca)} \cos m\phi + \hat{T}_{2,n,m}^{(Ca)} \sin m\phi \right) P_{n,m} = \mathbf{u}_e^{(0)} \Big|_{r=1} \cdot \tilde{\nabla} f^{(Ca)} - f^{(Ca)} \left( \frac{\partial \mathbf{u}_e^{(0)}}{\partial r} \right) \Big|_{r=1} \cdot \mathbf{e}_r, \\
T_3 &= \sum_{n=1}^4 \left( T_{3,n,m}^{(Ca)} \cos m\phi + \hat{T}_{3,n,m}^{(Ca)} \sin m\phi \right) P_{n,m} = \nabla \cdot \left( f^{(Ca)} \left( \frac{\partial \mathbf{u}_e^{(0)}}{\partial r} - \frac{\partial \mathbf{u}_i^{(0)}}{\partial r} \right) \Big|_{r=1} \right), \\
T_4 &= \sum_{n=1}^4 \left( T_{4,n,m}^{(Ca)} \cos m\phi + \hat{T}_{4,n,m}^{(Ca)} \sin m\phi \right) P_{n,m} = \left[ \begin{aligned}
& \mathbf{e}_r \cdot \nabla \times \left\{ \mathbf{e}_r \times \left( f^{(Ca)} \left( \frac{\partial \mathbf{T}_i^{(0)}}{\partial r} - \frac{\partial \mathbf{T}_e^{(0)}}{\partial r} \right) \Big|_{r=1} \right) \right\} \\
& + \mathbf{e}_r \cdot \nabla \times \left\{ \mathbf{e}_r \times (\boldsymbol{\tau}_e - \boldsymbol{\tau}_i) \Big|_{r=1} \cdot \tilde{\nabla} f^{(Ca)} \right\} \\
& + \mathbf{e}_r \cdot \nabla \times \left\{ \tilde{\nabla} f^{(Ca)} \times (\mathbf{T}_e^{(0)} - \mathbf{T}_i^{(0)}) \Big|_{r=1} \right\} \\
& + \tilde{\nabla} f^{(Ca)} \cdot \nabla \times \left\{ \mathbf{e}_r \times (\mathbf{T}_e^{(0)} - \mathbf{T}_i^{(0)}) \Big|_{r=1} \right\}
\end{aligned} \right] \Big|_{r=1}, \quad (\text{B4})
\end{aligned} \right\}$$

$$\begin{aligned}
T_5 &= \sum_{n=1}^4 \left( T_{5,n,m}^{(Ca)} \cos m\phi + \hat{T}_{5,n,m}^{(Ca)} \sin m\phi \right) P_{n,m} = \left[ \begin{aligned} &\mathbf{e}_r \cdot \nabla \times \left( f^{(Ca)} \left( \frac{\partial \mathbf{u}_i^{(0)}}{\partial r} - \frac{\partial \mathbf{u}_e^{(0)}}{\partial r} \right) \right) \Big|_{r=1} \\ &+ \tilde{\nabla} f^{(Ca)} \cdot \nabla \times (\mathbf{u}_e^{(0)} - \mathbf{u}_i^{(0)}) \Big|_{r=1} \end{aligned} \right], \\
T_6 &= \sum_{n=1}^4 \left( T_{6,n,m}^{(Ca)} \cos m\phi + \hat{T}_{6,n,m}^{(Ca)} \sin m\phi \right) P_{n,m} = \left[ \begin{aligned} &\tilde{\nabla} f^{(Ca)} \cdot \nabla \times (\mathbf{T}_e^{(0)} - \mathbf{T}_i^{(0)}) \Big|_{r=1} \\ &+ \mathbf{e}_r \cdot \nabla \times ((\boldsymbol{\tau}_e - \boldsymbol{\tau}_i) \Big|_{r=1} \cdot \tilde{\nabla} f^{(Ca)}) \\ &- \mathbf{e}_r \cdot \nabla \times \left( f^{(Ca)} \left( \frac{\partial \mathbf{T}_e^{(0)}}{\partial r} - \frac{\partial \mathbf{T}_i^{(0)}}{\partial r} \right) \right) \Big|_{r=1} \end{aligned} \right],
\end{aligned} \tag{B5}$$

where the operator  $\tilde{\nabla}$  is given by  $\tilde{\nabla} \equiv \mathbf{e}_\theta \frac{\partial}{\partial \theta} + \mathbf{e}_\phi \frac{1}{\sin \theta} \frac{\partial}{\partial \phi}$ . In equation (B5), the terms  $\boldsymbol{\tau}_{i,e}^{(0)}$  and  $\mathbf{T}_{i,e}^{(0)}$  represent the stress tensors and the traction vector, respectively which are of the form

$$\boldsymbol{\tau}_{i,e}^{(0)} = \boldsymbol{\tau}_{i,e}^{H(0)} + M \boldsymbol{\tau}_{i,e}^{E(0)}, \quad \mathbf{T}_{i,e}^{(0)} = \boldsymbol{\tau}_{i,e}^{(0)} \cdot \mathbf{e}_r. \tag{B6}$$

$\boldsymbol{\tau}_{i,e}^{H(0)}$  represents the hydrodynamic stress tensor and  $\boldsymbol{\tau}_{i,e}^{E(0)}$  represents the Maxwell stress tensor at the leading order and are given by

$$\left. \begin{aligned} \boldsymbol{\tau}_i^{H(0)} &= \left[ -p_i^{(0)} \mathbf{I} + \lambda \left\{ \nabla \mathbf{u}_i^{(0)} + (\nabla \mathbf{u}_i^{(0)})^T \right\} \right], \\ \boldsymbol{\tau}_e^{H(0)} &= \left[ -p_e^{(0)} \mathbf{I} + \nabla \mathbf{u}_e^{(0)} + (\nabla \mathbf{u}_e^{(0)})^T \right], \\ \boldsymbol{\tau}_i^{E(0)} &= S \left[ \mathbf{E}_i^{(0)} (\mathbf{E}_i^{(0)})^T - \frac{1}{2} |\mathbf{E}_i^{(0)}|^2 \mathbf{I} \right], \\ \boldsymbol{\tau}_e^{E(0)} &= \left[ \mathbf{E}_e^{(0)} (\mathbf{E}_e^{(0)})^T - \frac{1}{2} |\mathbf{E}_e^{(0)}|^2 \mathbf{I} \right]. \end{aligned} \right\} \tag{B7}$$

Next we represent the left side terms of equation (B3) in terms of solid spherical harmonics by following similar method as given in equations (A4)-(A5) by substituting the superscript  $Re_E$  by  $Ca$ . After that one can easily obtain the coefficients  $A_n^{(Re_E)}$ ,  $B_n^{(Re_E)}$ ,  $C_n^{(Re_E)}$ ,  $A_{-n-1}^{(Re_E)}$ ,  $B_{-n-1}^{(Re_E)}$  and  $C_{-n-1}^{(Re_E)}$  in the following general form

$$\left. \begin{aligned}
A_{n,m}^{(Ca)} &= - \frac{(2n+3) \left[ -(4n^2-1)\beta_{n,m}^{(Ca)} + \{(n-1)((2n(\lambda+1)) + (2\lambda+1))\} T_{1,n,m} \right. \\
&\quad \left. + (n+2)T_{2,n,m} + (2n+1)T_{3,n,m} - T_{4,n,m} + M(g_{n,m}^{e(Ca)} - g_{n,m}^{i(Ca)}) \right]}{n(2n+1)(\lambda+1)}, \\
B_{n,m}^{(Ca)} &= - \frac{A_{n,m}^{(Ca)}}{2(2n+3)} + \frac{T_{1,n,m}}{n}, \\
C_{n,m}^{(Ca)} &= \frac{M(h_{n,m}^{e(Ca)} - h_{n,m}^{i(Ca)}) - (n+2)T_{5,n,m} - T_{6,n,m}}{n(n+1)(\lambda(n-1) + (n+2))}, \\
A_{-n-1,m}^{(Ca)} &= - \frac{\left[ (4n^2-1)(2+\lambda(2n+1))\beta_{n,m}^{(Ca)} + \lambda(n-1)(2n-1)T_{1,n,m} \right. \\
&\quad \left. - (n+2)(2n-1)(2n+\lambda(2n+1))T_{2,n,m} - \lambda(4n^2-1)T_{3,n,m} \right. \\
&\quad \left. - (2n-1)T_{4,n,m} + M(2n-1)(g_{n,m}^{e(Ca)} - g_{n,m}^{i(Ca)}) \right]}{(\lambda+1)(n+1)(2n+1)}, \\
B_{-n-1,m}^{(Ca)} &= - \frac{\left[ \lambda(4n^2-1)\beta_{n,m}^{(Ca)} + \lambda(n-1)T_{1,n,m} - \lambda(2n+1)T_{3,n,m} - T_{4,n,m} \right. \\
&\quad \left. + \{2(1-n^2) - \lambda n(2n+1)\}T_{2,n,m} + M(g_{n,m}^{e(Ca)} - g_{n,m}^{i(Ca)}) \right]}{2(\lambda+1)(2n+1)(n+1)}, \\
C_{-n-1,m}^{(Ca)} &= \frac{M(h_{n,m}^{e(Ca)} - h_{n,m}^{i(Ca)}) + \lambda(n-1)T_{5,n,m} - T_{6,n,m}}{n\{n^2 + 3n + 2 + \lambda(n^2 - 1)\}}.
\end{aligned} \right\} \quad (B8)$$

The determination of the coefficients  $\hat{A}_{n,m}^{(Ca)}$ ,  $\hat{B}_{n,m}^{(Ca)}$ ,  $\hat{C}_{n,m}^{(Ca)}$ ,  $\hat{A}_{-n-1,m}^{(Ca)}$ ,  $\hat{B}_{-n-1,m}^{(Ca)}$  and  $\hat{C}_{-n-1,m}^{(Ca)}$  requires the substitution of  $\beta_{n,m}^{(Ca)}$ ,  $g_{n,m}^{i(Ca)}$ ,  $h_{n,m}^{i(Ca)}$ ,  $g_{n,m}^{e(Ca)}$ ,  $h_{n,m}^{e(Ca)}$  and  $T_{1,n,m} - T_{6,n,m}$  by  $\hat{\beta}_{n,m}^{(Ca)}$ ,  $\hat{g}_{n,m}^{i(Ca)}$ ,  $\hat{h}_{n,m}^{i(Ca)}$ ,  $\hat{g}_{n,m}^{e(Ca)}$ ,  $\hat{h}_{n,m}^{e(Ca)}$  and  $\hat{T}_{1,n,m} - \hat{T}_{6,n,m}$ , respectively in equation (B8). The terms  $\beta_{n,m}^{(Ca)}$  and  $\hat{\beta}_{n,m}^{(Ca)}$  present in equation (B8)c are given by

$$\left. \begin{aligned}
\beta_{n,m}^{(Ca)} &= \begin{cases} \beta_{1,0}^{(Ca)} = -U_{dz}^{(Ca)}, \beta_{1,1}^{(Ca)} = -U_{dx}^{(Ca)} \\ 0 \quad \forall n \geq 2 \end{cases} \\
\hat{\beta}_{n,m}^{(Ca)} &= \begin{cases} \hat{\beta}_{1,1}^{(Ca)} = -U_{dy}^{(Ca)} \\ 0 \quad \forall n \geq 2. \end{cases}
\end{aligned} \right\} \quad (B9)$$

The terms  $g_{n,m}^{e(Ca)}$ ,  $\hat{g}_{n,m}^{e(Ca)}$ ,  $h_{n,m}^{e(Ca)}$  and  $\hat{h}_{n,m}^{e(Ca)}$  which are present in equation (B8) are obtained from the  $O(Ca)$  electric field as



$$\left. \begin{aligned}
& \sum_{n=0}^4 \left[ g_{n,m}^{i(Ca)} \cos(m\phi) + \hat{g}_{n,m}^{i(Ca)} \sin(m\phi) \right] P_{n,m} = \left( \mathbf{r} \cdot \nabla \times \{ \mathbf{r} \times \mathbf{T}_i^{E(Ca)} \} \right) \Big|_{r=1}, \\
& \sum_{n=0}^4 \left[ g_{n,m}^{e(Ca)} \cos(m\phi) + \hat{g}_{n,m}^{e(Ca)} \sin(m\phi) \right] P_{n,m} = \left( \mathbf{r} \cdot \nabla \times \{ \mathbf{r} \times \mathbf{T}_e^{E(Ca)} \} \right) \Big|_{r=1}, \\
& \sum_{n=0}^4 \left[ h_{n,m}^{i(Ca)} \cos(m\phi) + \hat{h}_{n,m}^{i(Ca)} \sin(m\phi) \right] P_{n,m} = \left( \mathbf{r} \cdot \nabla \times \mathbf{T}_i^{E(Ca)} \right) \Big|_{r=1}, \\
& \sum_{n=0}^4 \left[ h_{n,m}^{e(Ca)} \cos(m\phi) + \hat{h}_{n,m}^{e(Ca)} \sin(m\phi) \right] P_{n,m} = \left( \mathbf{r} \cdot \nabla \times \mathbf{T}_e^{E(Ca)} \right) \Big|_{r=1},
\end{aligned} \right\} \quad (\text{B10})$$

where  $\mathbf{T}_{i,e}^{E(Ca)}$  represents the  $O(Ca)$  electric traction vector of the following form

$$\mathbf{T}_i^{E(Ca)} = S \begin{bmatrix} \left( E_{i,r}^{(Ca)} \right)^2 - \frac{1}{2} \left| \mathbf{E}_i^{(Ca)} \right|^2 \\ E_{i,r}^{(Ca)} E_{i,\theta}^{(Ca)} \\ E_{i,r}^{(Ca)} E_{i,\phi}^{(Ca)} \end{bmatrix}, \quad \mathbf{T}_e^{E(Ca)} = \begin{bmatrix} \left( E_{e,r}^{(Ca)} \right)^2 - \frac{1}{2} \left| \mathbf{E}_e^{(Ca)} \right|^2 \\ E_{e,r}^{(Ca)} E_{e,\theta}^{(Ca)} \\ E_{e,r}^{(Ca)} E_{e,\phi}^{(Ca)} \end{bmatrix}. \quad (\text{B11})$$

## REFERENCES

- AJAYI, O.O. 1978 A Note on Taylor's Electrohydrodynamic Theory. *Proc. R. Soc. A Math. Phys. Eng. Sci.* **364**(1719), 499–507.
- BANDOPADHYAY, A., MANDAL, S., KISHORE, N.K. & CHAKRABORTY, S. 2016 Uniform electric-field-induced lateral migration of a sedimenting drop. *J. Fluid Mech.* **792**, 553–589.
- BRENNER, H. 1964 The Stokes resistance of a slightly deformed sphere. *Chem. Eng. Sci.* **19**(8), 519–539.
- CHAFFEY, C.E. & BRENNER, H. 1967 A second-order theory for shear deformation of drops. *J. Colloid Interface Sci.* **24**(2), 258–269.
- HABER, S. & HETSRONI, G. 1971 The dynamics of a deformable drop suspended in an unbounded Stokes flow. *J. Fluid Mech.* **49**(02), 257–277.
- HAPPEL, J. & BRENNER, H. 1981 *Low Reynolds number hydrodynamics*, Dordrecht: Springer Netherlands.
- HETSRONI, G. & HABER, S. 1970 The flow in and around a droplet or bubble submerged in an unbound arbitrary velocity field. *Rheol. Acta* **9**(4), 488–496.
- IM, D.J. & KANG, I.S. 2003 Electrohydrodynamics of a drop under nonaxisymmetric electric fields. *J. Colloid Interface Sci.* **266**(1), 127–40.

LEAL, L.G. 2007 *Advanced Transport Phenomena*, Cambridge: Cambridge University Press.

XU, X. & HOMSY, G.M. 2006 The settling velocity and shape distortion of drops in a uniform electric field. *J. Fluid Mech.* **564**, 395.
